# Supplementary material for: Antiradical Activity of Dopamine, L-DOPA, Adrenaline, and Noradrenaline in Water/Methanol and in Liposomal Systems
Source: PubMed Central journal article supplement (PMC8822484; doi:10.1021/acs.joc.1c02308), 2021-12-06
Supplement: jo1c02308_si_001.pdf [file jo1c02308_si_001.pdf]

## Supporting Information

### Antiradical Activity of Dopamine, L-DOPA, Adrenaline, and Noradrenaline in Water / Methanol and in Liposomal Systems.

Katarzyna Jodko-Piórecka,<sup>a,\*</sup> Bożena Sikora,<sup>a,b</sup> Monika Kluzek,<sup>a,c</sup> Paweł Przybylski,<sup>a</sup>  
Grzegorz Litwinienko<sup>a,\*</sup>

<sup>a</sup> Faculty of Chemistry, University of Warsaw, Pasteura 1, 02-093, Warsaw, Poland

<sup>b</sup> Institute of Physics, Polish Academy of Sciences, Laboratory of Biological Physics, Al. Lotników 32/46, 02-668 Warsaw.

<sup>c</sup> Department of Molecular Chemistry and Materials Science, Weizmann Institute of Science, Herzl St 234, Rehovot 76100, Israel

\* corresponding authors: [kjodko@chem.uw.edu.pl](mailto:kjodko@chem.uw.edu.pl) (KJ-P), [litwin@chem.uw.edu.pl](mailto:litwin@chem.uw.edu.pl) (GL)

|                                                                                                               | Page |
|---------------------------------------------------------------------------------------------------------------|------|
| Table S1. The values of $pK_a$ for catecholamines.                                                            | S2   |
| Table S2. Kinetic data for the reaction of L-3,4-dihydroxyphenylalanine (L-DOPA) with $\text{dpph}^\bullet$ . | S3   |
| Table S3. Kinetic data for the reaction of dopamine (DA) with $\text{dpph}^\bullet$ .                         | S4   |
| Table S4. Kinetic data for the reaction of noradrenaline (NOR) with $\text{dpph}^\bullet$ .                   | S5   |
| Table S5. Kinetic data for the reaction of adrenaline (ADR) with $\text{dpph}^\bullet$ .                      | S6   |
| Acid / base equilibrium equations applied for calculation of the ionization degree of catecholamines.         | S7   |
| Figure S1. Dissociation diagram of DA.                                                                        | S10  |
| Figure S2. Dissociation diagram of L-DOPA.                                                                    | S10  |
| Figure S3. Dissociation diagram of NOR.                                                                       | S11  |
| Figure S4. Dissociation diagram of ADR.                                                                       | S11  |
| Figure S5. Kinetic traces for oxidation of DMPC liposomes inhibited by PMHC or DA.                            | S12  |
| Figure S6. Kinetic traces for oxidation of DMPC/DMPG 1:1 liposomes inhibited by PMHC or DA.                   | S12  |
| Figure S7. Kinetic traces for oxidation of DMPC/DMPG 1:3 liposomes inhibited by PMHC or DA.                   | S13  |
| Figure S8. Kinetic traces for oxidation of DMPG liposomes inhibited by PMHC or DA.                            | S13  |
| Table S6. Kinetic parameters for oxidation of liposomes inhibited by PMHC or DA.                              | S14  |
| References.                                                                                                   | S14  |

**Table S1.** The values of  $pK_a$  for DA (determined by *point by point* spectrophotometric analysis in comparison to literature data) and other catecholamines (taken from literature).<sup>a</sup>

| Ref                                    | Method                                            | $pK_{a0}$ | $pK_{a1}$         | $pK_{a2}$         | $pK_{a3}$ |
|----------------------------------------|---------------------------------------------------|-----------|-------------------|-------------------|-----------|
| <b>DA</b>                              |                                                   |           |                   |                   |           |
| this work                              | <i>point by point</i> spectrophotometric analysis |           | 8.37              | 10.25             | 12.49     |
| Baba et al. <sup>1</sup>               | density functional theory calculations            |           | 8.59              | 11.16             | 14.08     |
| Sánchez-Rivera et al. <sup>2</sup>     | spectrophotometric titration                      |           | 8.61              | 9.95              | 12.04     |
| Antikainen and Witikainen <sup>3</sup> | potentiometric titration                          |           | 8.85              | 10.31             |           |
| Aydin <sup>4</sup>                     | potentiometric titration                          |           | 8.85              | 10.32             | 12.62     |
| Kiss et al. <sup>5</sup>               | potentiometric titration                          |           | 8.89              | 10.41             | 13.1      |
| Kiss and Gergely <sup>6</sup>          | pH-metric titration                               |           | 8.89              | 10.41             | 13.10     |
| Nagy and Takács-Novák <sup>7</sup>     | potentiometric titration                          |           | 8.92              | 10.50             |           |
| Sedeh et al. <sup>8</sup>              | potentiometric titration                          |           | 8.93              | 10.49             |           |
| Rajan et al. <sup>9</sup>              | pH-titration                                      |           | 8.96              | 10.50             |           |
| Gh Bagheri <sup>10</sup>               | spectrophotometric titration                      |           | 9.03              | -                 | 13.15     |
| Gerard et al. <sup>11</sup>            | potentiometric titration                          |           | 9.05              | 10.55             | 12.81     |
| Sánchez-Rivera et al. <sup>2</sup>     | <i>point by point</i> analysis                    |           | 9.05              | 10.58             | 12.07     |
| Bretti et al. <sup>12</sup>            | potentiometry and spectrofluorimetry              |           | 9.06              | 10.41             |           |
| Grgas-Kučnar et al. <sup>13</sup>      | pH-titration                                      |           | 9.06              | 10.60             | 12.05     |
| Charkoudian and Franz <sup>14</sup>    | Combines potentiometric/spectrophotometric        |           | 9.59              | 10.14             | 13.11     |
| <b>L-DOPA</b>                          |                                                   |           |                   |                   |           |
| Martin <sup>15</sup>                   | potentiometric titration                          | 2.31      | 8.76              | 9.84              | 13.4      |
| Kiss et al. <sup>5</sup>               | potentiometric titration                          |           | 8.80              | 9.83              | 13.4      |
| Jameson et al. <sup>16</sup>           | <sup>1</sup> H NMR titration <sup>b</sup>         |           | 8.77 <sup>b</sup> | 9.81 <sup>b</sup> |           |
| <b>NOR</b>                             |                                                   |           |                   |                   |           |
| Nagy and Takács-Novák <sup>7</sup>     | potentiometric titration                          |           | 8.51              | 9.63              |           |
| Gergely et al. <sup>17</sup>           | pH-titration                                      |           | 8.58              | 9.53              | 12.9      |
| Aydin <sup>4</sup>                     | potentiometric titration                          |           | 8.58              | 9.53              | 12.93     |
| <b>ADR</b>                             |                                                   |           |                   |                   |           |
| Aydin <sup>4</sup>                     | potentiometric titration                          |           | 8.63              | 9.84              | 13.13     |
| Gergely et al. <sup>17</sup>           | pH-titration                                      |           | 8.64              | 9.84              | 13.1      |
| Nagy and Takács-Novák <sup>7</sup>     | potentiometric titration                          |           | 8.66              | 9.96              |           |
| Jameson et al. <sup>16</sup>           | <sup>1</sup> H NMR titration <sup>b</sup>         |           | 8.67 <sup>b</sup> | 9.91 <sup>b</sup> |           |

<sup>a</sup> Values determined by potentiometric titration: for catechol  $pK_{a1} = 9.25$  and  $pK_{a2} = 13.0$ ,<sup>18</sup> and for ethanolamine, 2-phenylethylamine, and ethylamine are, respectively, 9.52, 9.89, and 10.68.<sup>16</sup>

<sup>b</sup> Measured in D<sub>2</sub>O and recalculated to H<sub>2</sub>O.

**Table S2.** Kinetic data for the reaction of L-DOPA with  $\text{dpph}^\bullet$  determined by stop-flow measurements. Experiments were performed in water / methanol systems ( $v/v = 1/1$ ) at  $23^\circ\text{C}$ , pH 5.5 or pH 7.4 with  $\text{dpph}^\bullet$  at concentrations  $28.4 \mu\text{M}$  and  $5.69 \mu\text{M}$ , respectively. L-DOPA concentrations,  $[\text{L-DOPA}]$ , pseudo-first-order rate constants,  $k_{\text{exp}}$ , second-order rate constants,  $k^s$ , confidence interval of the slope for the 90% confidence level,  $\Delta k^s$ , and coefficients of determination,  $R^2$ , are given for each data series. The calculated mean second-order rate constants are given as  $k^s \pm$  absolute error.

| pH 5.5                                           |                                            |                   |                                            | pH 7.4                                                   |                                            |                       |                                            |
|--------------------------------------------------|--------------------------------------------|-------------------|--------------------------------------------|----------------------------------------------------------|--------------------------------------------|-----------------------|--------------------------------------------|
| series #1                                        |                                            | series #2         |                                            | series #1                                                |                                            | series #2             |                                            |
| [L-DOPA]<br>/ mM                                 | $k_{\text{exp}} 10^3$<br>/ $\text{s}^{-1}$ | [L-DOPA]<br>/ mM  | $k_{\text{exp}} 10^3$<br>/ $\text{s}^{-1}$ | [L-DOPA]<br>/ mM                                         | $k_{\text{exp}} 10^3$<br>/ $\text{s}^{-1}$ | [L-DOPA]<br>/ mM      | $k_{\text{exp}} 10^3$<br>/ $\text{s}^{-1}$ |
| 0.517                                            | 249                                        | 0.517             | 242                                        | 0.0444                                                   | 3 200                                      | 0.0444                | 2 960                                      |
| 0.402                                            | 200                                        | 0.402             | 197                                        | 0.0346                                                   | 2 690                                      | 0.0346                | 2 470                                      |
| 0.313                                            | 158                                        | 0.313             | 165                                        | 0.0269                                                   | 2 260                                      | 0.0269                | 2 030                                      |
| 0.235                                            | 120                                        | 0.235             | 127                                        | 0.0202                                                   | 1 930                                      | 0.0202                | 1 600                                      |
| 0.176                                            | 93.6                                       | 0.176             | 104                                        | 0.0151                                                   | 1 710                                      | 0.0151                | 1 560                                      |
| 0.126                                            | 67.7                                       | 0.126             | 84.9                                       | 0.0108                                                   | 1 380                                      | 0.0108                | 1 230                                      |
| 0.0898                                           | 53.5                                       | 0.0898            | 66.2                                       | 0.00771                                                  | 1 030                                      | 0.00771               | 943                                        |
| 0.0599                                           | 37.8                                       | 0.0599            | 51.8                                       | 0.00514                                                  | 807                                        | 0.00514               | 627                                        |
| 0.0399                                           | 27.4                                       | 0.0399            | 38.2                                       |                                                          |                                            | 0.00343               | 429                                        |
| $k^s = 466$                                      |                                            | $k^s = 421$       |                                            | $k^s = 58\,990$                                          |                                            | $k^s = 58\,680$       |                                            |
| $\Delta k^s = 7$                                 |                                            | $\Delta k^s = 16$ |                                            | $\Delta k^s = 5\,683$                                    |                                            | $\Delta k^s = 6\,662$ |                                            |
| $R^2 = 0.9996$                                   |                                            | $R^2 = 0.9972$    |                                            | $R^2 = 0.9842$                                           |                                            | $R^2 = 0.9739$        |                                            |
| $k^s = 440 \pm 30 \text{ M}^{-1} \text{ s}^{-1}$ |                                            |                   |                                            | $k^s = 59\,000 \pm 7\,000 \text{ M}^{-1} \text{ s}^{-1}$ |                                            |                       |                                            |

**Table S3.** Kinetic data for the reaction of DA with  $\text{dpph}^{\bullet}$  determined by stop-flow measurements. Experiments were performed in homogenous water / methanol systems ( $v/v = 1/1$ ) at  $23^{\circ}\text{C}$ , pH 5.5 or pH 7.4 with  $\text{dpph}^{\bullet}$  at concentrations  $24.4 \mu\text{M}$  and  $5.27 \mu\text{M}$ , respectively. DA concentrations,  $[\text{DA}]$ , pseudo-first-order rate constants,  $k_{\text{exp}}$ , second-order rate constants,  $k^{\text{s}}$ , confidence interval of the slope for the 90% confidence level,  $\Delta k^{\text{s}}$ , and coefficients of determination,  $R^2$ , are given for each data series. The calculated mean second-order rate constants are given as  $k^{\text{s}} \pm$  absolute error.

| pH 5.5                                                        |                                            |                            |                                            |                            |                                            | pH 7.4                                                              |                                            |                                 |                                            |
|---------------------------------------------------------------|--------------------------------------------|----------------------------|--------------------------------------------|----------------------------|--------------------------------------------|---------------------------------------------------------------------|--------------------------------------------|---------------------------------|--------------------------------------------|
| series #1                                                     |                                            | series #2                  |                                            | series #3                  |                                            | series #1                                                           |                                            | series #2                       |                                            |
| [DA]<br>/ mM                                                  | $k_{\text{exp}} 10^3$<br>/ $\text{s}^{-1}$ | [DA]<br>/ mM               | $k_{\text{exp}} 10^3$<br>/ $\text{s}^{-1}$ | [DA]<br>/ mM               | $k_{\text{exp}} 10^3$<br>/ $\text{s}^{-1}$ | [DA]<br>/ mM                                                        | $k_{\text{exp}} 10^3$<br>/ $\text{s}^{-1}$ | [DA]<br>/ mM                    | $k_{\text{exp}} 10^3$<br>/ $\text{s}^{-1}$ |
| 0.591                                                         | 724                                        | 0.459                      | 503                                        | 0.349                      | 467                                        | 0.0203                                                              | 3 370                                      | 0.0152                          | 2 570                                      |
| 0.459                                                         | 617                                        | 0.345                      | 400                                        | 0.262                      | 367                                        | 0.0152                                                              | 2 790                                      | 0.0114                          | 2 130                                      |
| 0.345                                                         | 479                                        | 0.185                      | 244                                        | 0.187                      | 266                                        | 0.0114                                                              | 2 090                                      | 0.00815                         | 1 460                                      |
| 0.258                                                         | 402                                        | 0.132                      | 162                                        | 0.134                      | 180                                        | 0.00815                                                             | 1 590                                      | 0.00582                         | 1 080                                      |
| 0.185                                                         | 303                                        | 0.0879                     | 118                                        | 0.0891                     | 119                                        | 0.00582                                                             | 1 160                                      | 0.00388                         | 683                                        |
| 0.132                                                         | 220                                        | 0.0586                     | 76.2                                       | 0.0594                     | 77.1                                       | 0.00388                                                             | 797                                        | 0.00259                         | 542                                        |
| 0.0879                                                        | 151                                        |                            |                                            |                            |                                            | 0.00259                                                             | 553                                        |                                 |                                            |
| 0.0586                                                        | 85.8                                       |                            |                                            |                            |                                            |                                                                     |                                            |                                 |                                            |
| $k^{\text{s}} = 1186$                                         |                                            | $k^{\text{s}} = 1062$      |                                            | $k^{\text{s}} = 1364$      |                                            | $k^{\text{s}} = 162\,235$                                           |                                            | $k^{\text{s}} = 167\,873$       |                                            |
| $\Delta k^{\text{s}} = 113$                                   |                                            | $\Delta k^{\text{s}} = 80$ |                                            | $\Delta k^{\text{s}} = 73$ |                                            | $\Delta k^{\text{s}} = 10\,841$                                     |                                            | $\Delta k^{\text{s}} = 14\,619$ |                                            |
| $R^2 = 0.9845$                                                |                                            | $R^2 = 0.9941$             |                                            | $R^2 = 0.9970$             |                                            | $R^2 = 0.9938$                                                      |                                            | $R^2 = 0.9920$                  |                                            |
| $k^{\text{s}} = 1\,200 \pm 200 \text{ M}^{-1} \text{ s}^{-1}$ |                                            |                            |                                            |                            |                                            | $k^{\text{s}} = 170\,000 \pm 10\,000 \text{ M}^{-1} \text{ s}^{-1}$ |                                            |                                 |                                            |

**Table S4.** Kinetic data for the reaction of NOR with dpph<sup>•</sup> determined by stop-flow measurements. Experiments were performed in homogenous water / methanol systems (v/v = 1/1) at 23°C, pH 5.5 or pH 7.4 with dpph<sup>•</sup> at concentrations 24.4 μM and 1.46 μM, respectively. NOR concentrations, [NOR], pseudo-first-order rate constants,  $k_{\text{exp}}$ , second-order rate constants,  $k^s$ , confidence interval of the slope for the 90% confidence level,  $\Delta k^s$ , and coefficients of determination,  $R^2$ , are given for each data series. The calculated mean second-order rate constants are given as  $k^s \pm$  absolute error.

| pH 5.5                                           |                                            |                  |                                            | pH 7.4                                                   |                                            |                       |                                            |
|--------------------------------------------------|--------------------------------------------|------------------|--------------------------------------------|----------------------------------------------------------|--------------------------------------------|-----------------------|--------------------------------------------|
| series #1                                        |                                            | series #2        |                                            | series #1                                                |                                            | series #2             |                                            |
| [NOR]<br>/ mM                                    | $k_{\text{exp}} 10^3$<br>/ s <sup>-1</sup> | [NOR]<br>/ mM    | $k_{\text{exp}} 10^3$<br>/ s <sup>-1</sup> | [NOR]<br>/ mM                                            | $k_{\text{exp}} 10^3$<br>/ s <sup>-1</sup> | [NOR]<br>/ mM         | $k_{\text{exp}} 10^3$<br>/ s <sup>-1</sup> |
| 0.733                                            | 217                                        | 0.733            | 237                                        | 0.0376                                                   | 1 840                                      | 0.0292                | 1 390                                      |
| 0.570                                            | 176                                        | 0.570            | 185                                        | 0.0292                                                   | 1 550                                      | 0.0227                | 1 120                                      |
| 0.443                                            | 150                                        | 0.443            | 145                                        | 0.0227                                                   | 1 370                                      | 0.0171                | 849                                        |
| 0.333                                            | 134                                        | 0.333            | 113                                        | 0.0171                                                   | 1 070                                      | 0.0128                | 679                                        |
| 0.249                                            | 102                                        | 0.249            | 97.4                                       | 0.0128                                                   | 868                                        | 0.00914               | 506                                        |
| 0.178                                            | 68.7                                       | 0.178            | 70.0                                       | 0.00914                                                  | 636                                        | 0.00653               | 379                                        |
| 0.127                                            | 53.1                                       | 0.127            | 52.2                                       | 0.00653                                                  | 488                                        | 0.00435               | 261                                        |
| 0.0848                                           | 39.3                                       | 0.0848           | 41.4                                       | 0.00435                                                  | 335                                        | 0.00290               | 183                                        |
| 0.0566                                           | 29.1                                       | 0.0566           | 31.8                                       | 0.00290                                                  | 240                                        |                       |                                            |
| $k^s = 278$                                      |                                            | $k^s = 299$      |                                            | $k^s = 46\ 762$                                          |                                            | $k^s = 45\ 550$       |                                            |
| $\Delta k^s = 29$                                |                                            | $\Delta k^s = 9$ |                                            | $\Delta k^s = 4\ 545$                                    |                                            | $\Delta k^s = 1\ 341$ |                                            |
| $R^2 = 0.9776$                                   |                                            | $R^2 = 0.9981$   |                                            | $R^2 = 0.9807$                                           |                                            | $R^2 = 0.9985$        |                                            |
| $k^s = 290 \pm 30\ \text{M}^{-1}\ \text{s}^{-1}$ |                                            |                  |                                            | $k^s = 46\ 000 \pm 5\ 000\ \text{M}^{-1}\ \text{s}^{-1}$ |                                            |                       |                                            |

**Table S5.** Kinetic data for the reaction of ADR with dpph<sup>•</sup> determined by stop-flow measurements. Experiments were performed in homogenous water / methanol systems (v/v = 1/1) at 23°C, pH 5.5 or pH 7.4 with dpph<sup>•</sup> at concentrations 28.4 μM and 5.48 μM, respectively. ADR concentrations, [ADR], pseudo-first-order rate constants,  $k_{\text{exp}}$ , second-order rate constants,  $k^s$ , confidence interval of the slope for the 90% confidence level,  $\Delta k^s$ , and coefficients of determination,  $R^2$ , are given for each data series. The calculated mean second-order rate constants are given as  $k^s \pm$  absolute error.

| pH 5.5                                           |                                            |                   |                                            | pH 7.4                                                 |                                            |                      |                                            |                      |                                            |
|--------------------------------------------------|--------------------------------------------|-------------------|--------------------------------------------|--------------------------------------------------------|--------------------------------------------|----------------------|--------------------------------------------|----------------------|--------------------------------------------|
| series #1                                        |                                            | series #2         |                                            | series #1                                              |                                            | series #2            |                                            | series #3            |                                            |
| [ADR]<br>/ mM                                    | $k_{\text{exp}} 10^3$<br>/ s <sup>-1</sup> | [ADR]<br>/ mM     | $k_{\text{exp}} 10^3$<br>/ s <sup>-1</sup> | [ADR]<br>/ mM                                          | $k_{\text{exp}} 10^3$<br>/ s <sup>-1</sup> | [ADR]<br>/ mM        | $k_{\text{exp}} 10^3$<br>/ s <sup>-1</sup> | [ADR]<br>/ mM        | $k_{\text{exp}} 10^3$<br>/ s <sup>-1</sup> |
| 0.458                                            | 342                                        | 0.589             | 512                                        | 0.133                                                  | 3 840                                      | 0.0400               | 1 400                                      | 0.0485               | 1 600                                      |
| 0.357                                            | 269                                        | 0.458             | 439                                        | 0.104                                                  | 2 920                                      | 0.0311               | 1 090                                      | 0.0377               | 1 380                                      |
| 0.267                                            | 209                                        | 0.357             | 365                                        | 0.0806                                                 | 2 410                                      | 0.0242               | 884                                        | 0.0293               | 1 080                                      |
| 0.201                                            | 162                                        | 0.201             | 300                                        | 0.0604                                                 | 1 910                                      | 0.0181               | 744                                        | 0.0220               | 855                                        |
| 0.143                                            | 146                                        | 0.143             | 230                                        | 0.0453                                                 | 1 640                                      | 0.0136               | 558                                        | 0.0165               | 714                                        |
| 0.102                                            | 123                                        | 0.102             | 210                                        | 0.0324                                                 | 1 160                                      | 0.00971              | 411                                        | 0.0118               | 540                                        |
| 0.0682                                           | 83.9                                       |                   |                                            | 0.0231                                                 | 919                                        | 0.00694              | 291                                        | 0.00841              | 439                                        |
| 0.0455                                           | 65.2                                       |                   |                                            | 0.0154                                                 | 648                                        | 0.00462              | 208                                        | 0.00561              | 306                                        |
|                                                  |                                            |                   |                                            | 0.0103                                                 | 467                                        | 0.00308              | 160                                        | 0.00374              | 198                                        |
| $k^s = 640$                                      |                                            | $k^s = 614$       |                                            | $k^s = 26 527$                                         |                                            | $k^s = 33 313$       |                                            | $k^s = 31 300$       |                                            |
| $\Delta k^s = 47$                                |                                            | $\Delta k^s = 65$ |                                            | $\Delta k^s = 1 243$                                   |                                            | $\Delta k^s = 1 594$ |                                            | $\Delta k^s = 1 990$ |                                            |
| $R^2 = 0.9909$                                   |                                            | $R^2 = 0.9883$    |                                            | $R^2 = 0.9955$                                         |                                            | $R^2 = 0.9953$       |                                            | $R^2 = 0.9917$       |                                            |
| $k^s = 630 \pm 60 \text{ M}^{-1} \text{ s}^{-1}$ |                                            |                   |                                            | $k^s = 30 000 \pm 3 000 \text{ M}^{-1} \text{ s}^{-1}$ |                                            |                      |                                            |                      |                                            |

**Acid / base equilibrium equations applied for calculation of the ionization degree of catecholamines**

Dopamine (DA):

Tribasic DA exists in four ionization states, i.e. as a cation (DA-H<sub>3</sub><sup>+</sup>), zwitterion (DA-H<sub>2</sub>), monoanion (DA-H<sup>-</sup>), and dianion (DA<sup>2-</sup>). The molar fractions of these forms of DA were calculated from equations 1 – 4 with the values of acidity constant pK<sub>a1</sub> = 8.37, pK<sub>a2</sub> = 10.25, and pK<sub>a3</sub> = 12.49, obtained within this work.

$$X(\text{DA-H}_3^+) = \frac{[\text{DA-H}_3^+]}{[\text{DA}]_0} = \frac{[\text{H}^+]^3}{[\text{H}^+]^3 + K_{a1}[\text{H}^+]^2 + K_{a1}K_{a2}[\text{H}^+] + K_{a1}K_{a2}K_{a3}} \quad (\text{S1})$$

$$X(\text{DA-H}_2) = \frac{[\text{DA-H}_2]}{[\text{DA}]_0} = \frac{K_{a1}[\text{H}^+]^2}{[\text{H}^+]^3 + K_{a1}[\text{H}^+]^2 + K_{a1}K_{a2}[\text{H}^+] + K_{a1}K_{a2}K_{a3}} \quad (\text{S2})$$

$$X(\text{DA-H}^-) = \frac{[\text{DA-H}^-]}{[\text{DA}]_0} = \frac{K_{a1}K_{a2}[\text{H}^+]}{[\text{H}^+]^3 + K_{a1}[\text{H}^+]^2 + K_{a1}K_{a2}[\text{H}^+] + K_{a1}K_{a2}K_{a3}} \quad (\text{S3})$$

$$X(\text{DA}^{2-}) = \frac{[\text{DA}^{2-}]}{[\text{DA}]_0} = \frac{K_{a1}K_{a2}K_{a3}}{[\text{H}^+]^3 + K_{a1}[\text{H}^+]^2 + K_{a1}K_{a2}[\text{H}^+] + K_{a1}K_{a2}K_{a3}} \quad (\text{S4})$$

L-DOPA:

L-DOPA undergoes four-step ionization and five different ionization states can be distinguished depending on pH: cation (L-DOPA-H<sub>4</sub><sup>+</sup>), zwitterion (L-DOPA-H<sub>3</sub>), monoanion (L-DOPA-H<sub>2</sub><sup>-</sup>), dianion (L-DOPA-H<sup>2-</sup>), and trianion (L-DOPA<sup>3-</sup>). Molar fractions of L-DOPA at different ionization states were calculated from equations 5-9 with pK<sub>a0</sub> = 2.31, pK<sub>a1</sub> = 8.76, pK<sub>a2</sub> = 9.84, and pK<sub>a3</sub> = 13.4 [1].

$$\begin{aligned} X(\text{L-DOPA-H}_4^+) &= \frac{[\text{L-DOPA-H}_4^+]}{[\text{L-DOPA}]_0} = \\ &= \frac{[\text{H}^+]^4}{[\text{H}^+]^4 + K_{a0}[\text{H}^+]^3 + K_{a0}K_{a1}[\text{H}^+]^2 + K_{a0}K_{a1}K_{a2}[\text{H}^+] + K_{a0}K_{a1}K_{a2}K_{a3}} \end{aligned} \quad (\text{S5})$$

$$\begin{aligned}
X(\text{L-DOPA-H}_3) &= \frac{[\text{L-DOPA-H}_3]}{[\text{L-DOPA}]_0} = \\
&= \frac{K_{a0}[\text{H}^+]^3}{[\text{H}^+]^4 + K_{a0}[\text{H}^+]^3 + K_{a0}K_{a1}[\text{H}^+]^2 + K_{a0}K_{a1}K_{a2}[\text{H}^+] + K_{a0}K_{a1}K_{a2}K_{a3}}
\end{aligned} \tag{S6}$$

$$\begin{aligned}
X(\text{L-DOPA-H}_2^-) &= \frac{[\text{L-DOPA-H}_2^-]}{[\text{L-DOPA}]_0} = \\
&= \frac{K_{a0}K_{a1}[\text{H}^+]^2}{[\text{H}^+]^4 + K_{a0}[\text{H}^+]^3 + K_{a0}K_{a1}[\text{H}^+]^2 + K_{a0}K_{a1}K_{a2}[\text{H}^+] + K_{a0}K_{a1}K_{a2}K_{a3}}
\end{aligned} \tag{7}$$

$$\begin{aligned}
X(\text{L-DOPA-H}^{2-}) &= \frac{[\text{L-DOPA-H}^{2-}]}{[\text{L-DOPA}]_0} = \\
&= \frac{K_{a0}K_{a1}K_{a2}[\text{H}^+]}{[\text{H}^+]^4 + K_{a0}[\text{H}^+]^3 + K_{a0}K_{a1}[\text{H}^+]^2 + K_{a0}K_{a1}K_{a2}[\text{H}^+] + K_{a0}K_{a1}K_{a2}K_{a3}}
\end{aligned} \tag{S8}$$

$$\begin{aligned}
X(\text{L-DOPA}^{3-}) &= \frac{[\text{L-DOPA}^{3-}]}{[\text{L-DOPA}]_0} = \\
&= \frac{K_{a0}K_{a1}K_{a2}K_{a3}}{[\text{H}^+]^4 + K_{a0}[\text{H}^+]^3 + K_{a0}K_{a1}[\text{H}^+]^2 + K_{a0}K_{a1}K_{a2}[\text{H}^+] + K_{a0}K_{a1}K_{a2}K_{a3}}
\end{aligned} \tag{S9}$$

Noradrenaline (NOR):

NOR undergoes four-step ionization and five different ionization states can be distinguished depending on pH: cation (NOR-H<sub>4</sub><sup>+</sup>), zwitterion (NOR-H<sub>3</sub>), monoanion (NOR-H<sub>2</sub><sup>-</sup>), dianion (NOR-H<sup>2-</sup>), and trianion (NOR<sup>3-</sup>). The hydroxyl group in the ethylene side chains of NOR is very basic (with pK<sub>a</sub> > 13)<sup>19</sup> and its deprotonation is negligible over the evaluate pH range 2-12.

Molar fractions of NOR at different ionization states were calculated from equations 10-13 with pK<sub>a1</sub> = 8.58, pK<sub>a2</sub> = 9.53, pK<sub>a3</sub> = 12.9.

$$X(\text{NOR - H}_4^+) = \frac{[\text{NOR - H}_4^+]}{[\text{NOR}]_0} = \frac{[\text{H}^+]^3}{[\text{H}^+]^3 + K_{a1}[\text{H}^+]^2 + K_{a1}K_{a2}[\text{H}^+] + K_{a1}K_{a2}K_{a3}} \tag{S10}$$

$$X(\text{NOR - H}_3) = \frac{[\text{NOR - H}_3]}{[\text{NOR}]_0} = \frac{K_{a1}[\text{H}^+]^2}{[\text{H}^+]^3 + K_{a1}[\text{H}^+]^2 + K_{a1}K_{a2}[\text{H}^+] + K_{a1}K_{a2}K_{a3}} \tag{S11}$$



$$X(\text{NOR} - \text{H}_2^-) = \frac{[\text{NOR} - \text{H}_2^-]}{[\text{NOR}]_0} = \frac{K_{a1}K_{a2}[\text{H}^+]}{[\text{H}^+]^3 + K_{a1}[\text{H}^+]^2 + K_{a1}K_{a2}[\text{H}^+] + K_{a1}K_{a2}K_{a3}} \quad (\text{S12})$$

$$X(\text{NOR} - \text{H}^{2-}) = \frac{[\text{NOR} - \text{H}^{2-}]}{[\text{NOR}]_0} = \frac{K_{a1}K_{a2}K_{a3}}{[\text{H}^+]^3 + K_{a1}[\text{H}^+]^2 + K_{a1}K_{a2}[\text{H}^+] + K_{a1}K_{a2}K_{a3}} \quad (\text{S13})$$

Adrenaline (ADR):

ADR undergoes four-step ionization and five different ionization states can be distinguished depending on pH: cation (ADR-H<sub>4</sub><sup>+</sup>), zwitterion (ADR-H<sub>3</sub>), monoanion (ADR-H<sub>2</sub><sup>-</sup>), dianion (ADR-H<sup>2-</sup>), and trianion (ADR<sup>3-</sup>). The hydroxyl group in the ethylene side chains of ADR is very basic (with pK<sub>a4</sub> > 13) [2] and its deprotonation is negligible over the evaluate pH range 2-12. Molar fractions of ADR at different ionization states were calculated from equations 14-17 with pK<sub>a1</sub> = 8.64, pK<sub>a2</sub> = 9.84, pK<sub>a3</sub> = 13.1 [3].<sup>17</sup>

$$X(\text{ADR} - \text{H}_4^+) = \frac{[\text{ADR} - \text{H}_4^+]}{[\text{ADR}]_0} = \frac{[\text{H}^+]^3}{[\text{H}^+]^3 + K_{a1}[\text{H}^+]^2 + K_{a1}K_{a2}[\text{H}^+] + K_{a1}K_{a2}K_{a3}} \quad (\text{S14})$$

$$X(\text{ADR} - \text{H}_3) = \frac{[\text{ADR} - \text{H}_3]}{[\text{ADR}]_0} = \frac{K_{a1}[\text{H}^+]^2}{[\text{H}^+]^3 + K_{a1}[\text{H}^+]^2 + K_{a1}K_{a2}[\text{H}^+] + K_{a1}K_{a2}K_{a3}} \quad (\text{S15})$$

$$X(\text{ADR} - \text{H}_2^-) = \frac{[\text{ADR} - \text{H}_2^-]}{[\text{ADR}]_0} = \frac{K_{a1}K_{a2}[\text{H}^+]}{[\text{H}^+]^3 + K_{a1}[\text{H}^+]^2 + K_{a1}K_{a2}[\text{H}^+] + K_{a1}K_{a2}K_{a3}} \quad (\text{S16})$$

$$X(\text{ADR} - \text{H}^{2-}) = \frac{[\text{ADR} - \text{H}^{2-}]}{[\text{ADR}]_0} = \frac{K_{a1}K_{a2}K_{a3}}{[\text{H}^+]^3 + K_{a1}[\text{H}^+]^2 + K_{a1}K_{a2}[\text{H}^+] + K_{a1}K_{a2}K_{a3}} \quad (\text{S17})$$

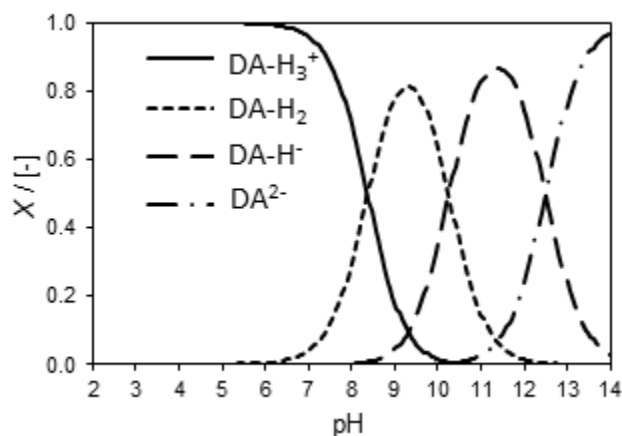

**Figure S1.** Dissociation diagram of DA over the pH range 2 – 14 obtained from the acid-base equilibrium equations collected in Appendix S1 with the experimental  $pK_a$  values obtained within this study. Abbreviations:  $DA-H_3^+$  - cationic DA;  $DA-H_2$  - zwitterionic DA;  $DA-H^-$  - DA monoanion;  $DA^{2-}$  - DA dianion.

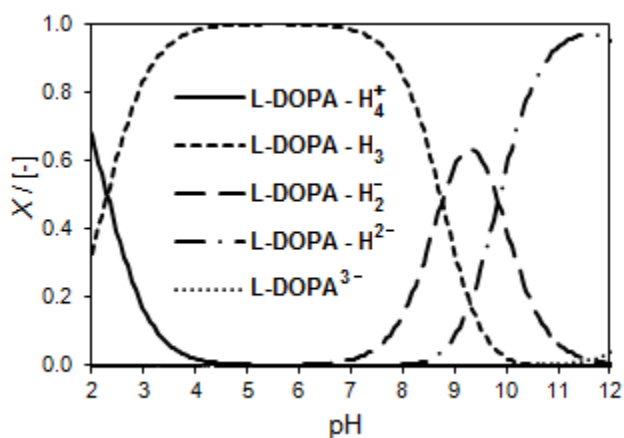

**Figure S2.** Dissociation diagram of L-DOPA over the pH range 2 – 14 obtained from the acid-base equilibrium equations collected in Appendix S1 with the literature  $pK_a$  values [1]. Abbreviations:  $L-DOPA-H_4^+$  - cationic L-DOPA;  $L-DOPA-H_3$  - zwitterionic L-DOPA;  $L-DOPA-H_2^-$  - L-DOPA monoanion;  $L-DOPA-H^{2-}$  - L-DOPA dianion;  $L-DOPA^{3-}$  - L-DOPA trianion.

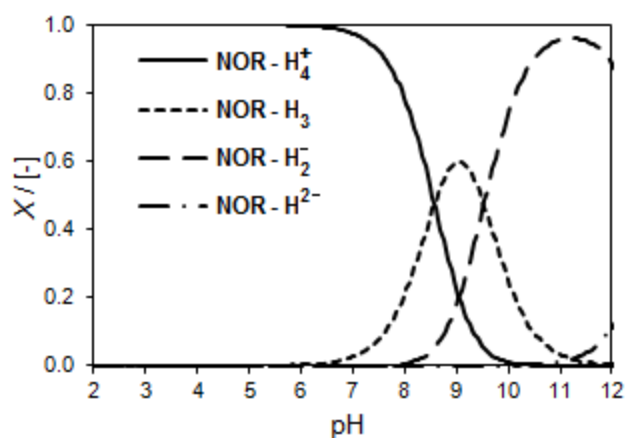

**Figure S3.** Dissociation diagram of NOR over the pH range 2 – 14 obtained from the acid-base equilibrium equations collected in Appendix S1 with the literature  $pK_a$  values [3]. Abbreviations: NOR- $H_4^+$  - cationic NOR; NOR- $H_3$  - zwitterionic NOR; NOR- $H_2^-$  - NOR monoanion; NOR- $H^{2-}$  - NOR dianion.

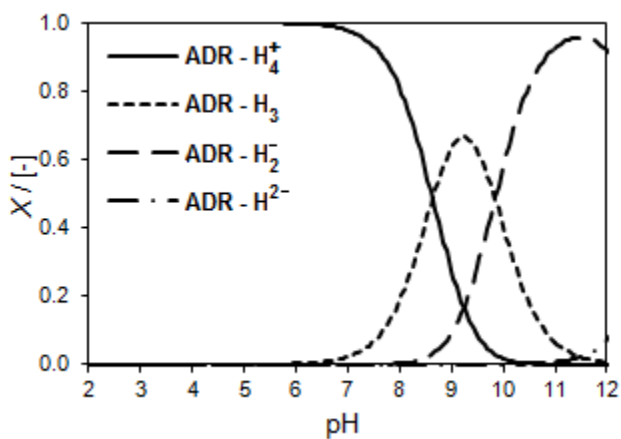

**Figure S4.** Dissociation diagram of ADR over the pH range 2 – 14 obtained from the acid-base equilibrium equations collected in Appendix S1 with the literature  $pK_a$  values [3]. Abbreviations: ADR- $H_4^+$  - cationic ADR; ADR- $H_3$  - zwitterionic ADR; ADR- $H_2^-$  - ADR monoanion; ADR- $H^{2-}$  - ADR dianion.

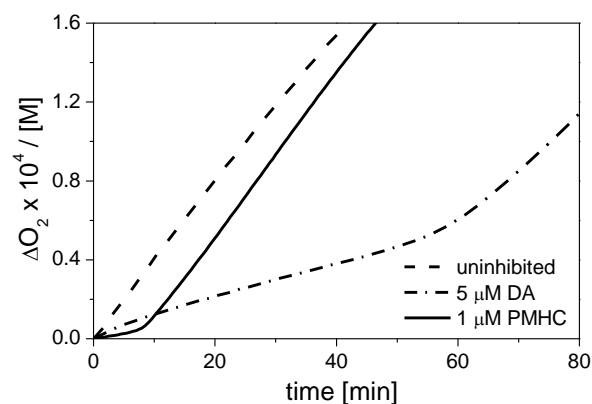

**Figure S5.** Plots of oxygen uptake,  $\Delta[\text{O}_2]$ , recorded during the peroxidation of MeLin in LUVs composed of DMPC: uninhibited peroxidation proceeding at rate  $R_{\text{ox}1}$  (dashed line); peroxidation inhibited by  $1 \mu\text{M}$  PMHC (solid line) and  $5 \mu\text{M}$  DA (dash-dotted line). Inhibited processes proceed at the rate  $R_{\text{inh}}$  during induction period ( $\tau_{\text{ind}}$ ) and at the rate  $R_{\text{ox}2}$  after the end of  $\tau_{\text{ind}}$ . For the values of parameters  $R_{\text{ox}1}$ ,  $R_{\text{inh}}$ ,  $\tau_{\text{ind}}$  and  $R_{\text{ox}2}$  see Table S6. Experiments were performed at 310 K at pH 7.0 with 10 mM ABAP used to initiate the peroxidation of MeLin.

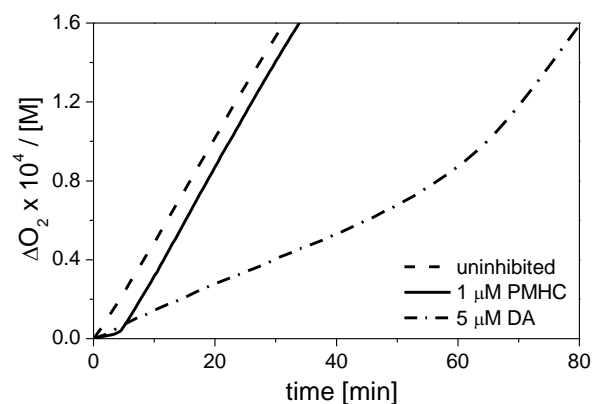

**Figure S6.** Plots of oxygen uptake,  $\Delta[\text{O}_2]$ , recorded during the peroxidation of MeLin in LUVs composed of DMPC and DMPG at molar ratio 1:1: uninhibited peroxidation proceeding at rate  $R_{\text{ox}1}$  (dashed line); peroxidation inhibited by  $1 \mu\text{M}$  PMHC (solid line) and  $5 \mu\text{M}$  DA (dash-dotted line). Inhibited processes proceed at the rate  $R_{\text{inh}}$  during induction period ( $\tau_{\text{ind}}$ ) and at the rate  $R_{\text{ox}2}$  after the end of  $\tau_{\text{ind}}$ . For the values of parameters  $R_{\text{ox}1}$ ,  $R_{\text{inh}}$ ,  $\tau_{\text{ind}}$  and  $R_{\text{ox}2}$  see Table S6. Experiments were performed at 310 K at pH 7.0 with 10 mM ABAP used to initiate the peroxidation of MeLin.

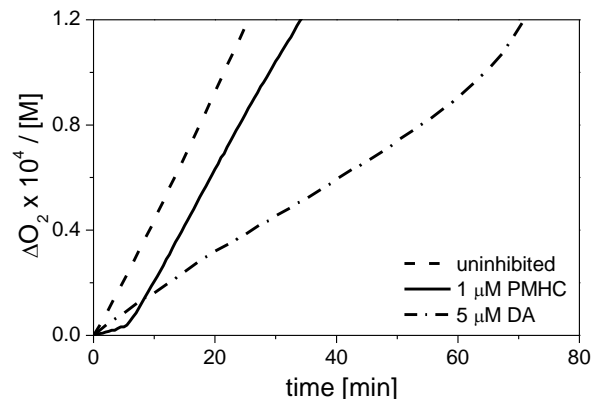

**Figure S7.** Plots of oxygen uptake,  $\Delta[\text{O}_2]$ , recorded during the peroxidation of MeLin in LUVs composed of DMPC and DMPG at molar ratio 1:3: uninhibited peroxidation proceeding at rate  $R_{\text{ox1}}$  (dashed line); peroxidation inhibited by  $1 \mu\text{M}$  PMHC (solid line) and  $5 \mu\text{M}$  DA (dash-dotted line). Inhibited processes proceed at the rate  $R_{\text{inh}}$  during induction period ( $\tau_{\text{ind}}$ ) and at the rate  $R_{\text{ox2}}$  after the end of  $\tau_{\text{ind}}$ . For the values of parameters  $R_{\text{ox1}}$ ,  $R_{\text{inh}}$ ,  $\tau_{\text{ind}}$  and  $R_{\text{ox2}}$  see Table S6. Experiments were performed at 310 K at pH 7.0 with 10 mM ABAP used to initiate the peroxidation of MeLin.

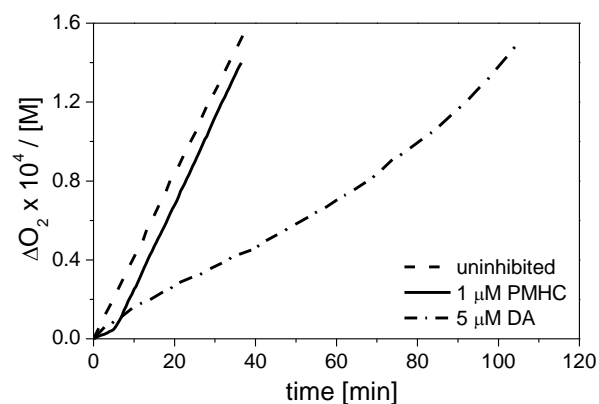

**Figure S8.** Plots of oxygen uptake,  $\Delta[\text{O}_2]$ , recorded during the peroxidation of MeLin in LUVs composed of DMPG: uninhibited peroxidation proceeding at rate  $R_{\text{ox1}}$  (dashed line); peroxidation inhibited by  $1 \mu\text{M}$  PMHC (solid line) and  $5 \mu\text{M}$  DA (dash-dotted line). Inhibited processes proceed at the rate  $R_{\text{inh}}$  during induction period ( $\tau_{\text{ind}}$ ) and at the rate  $R_{\text{ox2}}$  after the end of  $\tau_{\text{ind}}$ . For the values of parameters  $R_{\text{ox1}}$ ,  $R_{\text{inh}}$ ,  $\tau_{\text{ind}}$  and  $R_{\text{ox2}}$  see Table S6. Experiments were performed at 310 K at pH 7.0 with 10 mM ABAP used to initiate the peroxidation of MeLin.

**Table S6.** Kinetic parameters determined for the peroxidation of 2.74 mM MeLin in DMPC / DMPG LUVs inhibited by 1  $\mu$ M PMHC or 5  $\mu$ M DA: the length of induction period,  $\tau_{\text{ind}}$ , the rate of uninhibited peroxidation,  $R_{\text{ox1}}$ , the rate of inhibited peroxidation,  $R_{\text{inh}}$  (during the induction period); the rate of peroxidation after the end of induction periods,  $R_{\text{ox2}}$ . Experiments were performed at 310 K at pH 7.0 with ABAP as an initiator. All numbers represent the average values obtained from series of measurements with calculated standard deviations.

| model                 | uninh                                              | 1 $\mu$ M PMHC            |                                                    |                                                    | 5 $\mu$ M DA              |                                                    |                                                    |
|-----------------------|----------------------------------------------------|---------------------------|----------------------------------------------------|----------------------------------------------------|---------------------------|----------------------------------------------------|----------------------------------------------------|
|                       | $R_{\text{ox1}} \cdot 10^8$<br>/ $\text{M s}^{-1}$ | $\tau_{\text{ind}}$ / min | $R_{\text{inh}} \cdot 10^8$<br>/ $\text{M s}^{-1}$ | $R_{\text{ox2}} \cdot 10^8$<br>/ $\text{M s}^{-1}$ | $\tau_{\text{ind}}$ / min | $R_{\text{inh}} \cdot 10^8$<br>/ $\text{M s}^{-1}$ | $R_{\text{ox2}} \cdot 10^8$<br>/ $\text{M s}^{-1}$ |
| micelles <sup>a</sup> | 42.2 $\pm$ 3.3                                     | 7.3 $\pm$ 0.5             | 2.1 $\pm$ 0.1                                      | 26.0 $\pm$ 1.2                                     | no antioxidant activity   |                                                    |                                                    |
| LUVs: <sup>b</sup>    |                                                    |                           |                                                    |                                                    |                           |                                                    |                                                    |
| $X_{\text{DMPG}}$     |                                                    |                           |                                                    |                                                    |                           |                                                    |                                                    |
| 0.00                  | 6.0 $\pm$ 0.4                                      | 9.6 $\pm$ 0.8             | 1.3 $\pm$ 0.2                                      | 6.6 $\pm$ 0.9                                      | 57.0 $\pm$ 5.4            | 1.3 $\pm$ 0.1                                      | 5.0 $\pm$ 0.3                                      |
| 0.25                  | 7.9 $\pm$ 0.4                                      | 6.0 $\pm$ 0.4             | 1.2 $\pm$ 0.1                                      | 8.8 $\pm$ 0.6                                      | 55.7 $\pm$ 2.4            | 2.0 $\pm$ 0.3                                      | 8.0 $\pm$ 0.7                                      |
| 0.50                  | 8.0 $\pm$ 0.9                                      | 5.9 $\pm$ 0.1             | 1.4 $\pm$ 0.2                                      | 9.1 $\pm$ 0.3                                      | 51.2 $\pm$ 4.1            | 2.3 $\pm$ 0.2                                      | 6.8 $\pm$ 0.5                                      |
| 0.75                  | 7.6 $\pm$ 1.1                                      | 5.9 $\pm$ 0.2             | 1.4 $\pm$ 0.2                                      | 7.8 $\pm$ 1.2                                      | 54.9 $\pm$ 7.7            | 2.3 $\pm$ 0.2                                      | 6.5 $\pm$ 0.8                                      |
| 1.00                  | 7.3 $\pm$ 0.6                                      | 5.3 $\pm$ 0.5             | 1.5 $\pm$ 0.2                                      | 7.7 $\pm$ 0.5                                      | 53.3 $\pm$ 4.5            | 2.2 $\pm$ 0.1                                      | 3.8 $\pm$ 0.3                                      |

<sup>a</sup> Kinetic parameters obtained for 2.74 mM MeLin peroxidation in Triton X-100 micelles were added for comparison;

<sup>b</sup> LUVs were composed from DMPC and DMPG, with  $X_{\text{DMPG}}$  – the molar fraction of DMPG in phospholipids:  $[n_{\text{DMPG}}/(n_{\text{DMPG}} + n_{\text{DMPC}})]$ .

## References:

- (1) Baba, T.; Matsui, T.; Kamiya, K.; Nakano, M.; Shigeta, Y. A density functional study on the  $pK_a$  of small polyprotic molecules *Int. J. Quantum Chem.* **2014**, *114*, 1128-1134.
- (2) Sánchez-Rivera, A. E.; Corona-Avenidaño, S.; Alarcón-Angeles, G.; Rojas-Hernández, A.; Ramírez-Silva, M. T.; Romero-Romo, M. A. Spectrophotometric study on the stability of dopamine and the determination of its acidity constants *Spectrochim. Acta, Part A* **2003**, *59*, 3193-3203.
- (3) Antikainen, P. J.; Witikainen, U. A comparative study on the ionization of catechol amines in aqueous solutions *Acta Chem. Scand.* **1973**, *27*, 2075-2082.
- (4) Aydin, R. Study on the interaction of yttrium(III) with adrenaline, noradrenaline, and dopamine *J. Chem. Eng. Data* **2007**, *52*, 2400-2404.
- (5) Kiss, T.; Sóvágó, I.; Martin, R. B. Complexes of 3,4-dihydroxyphenyl derivatives. 9.  $\text{Al}^{3+}$  binding to catecholamines and tiron *J. Am. Chem. Soc.* **1989**, *111*, 3611-3614.
- (6) Kiss, T.; Gergely, A. Complexes of 3,4-dihydroxyphenyl derivatives, III. Equilibrium study of parent and some mixed ligand complexes of dopamine, alanine and pyrocatechol with nickel(II), copper(II) and zinc(II) ions *Inorg. Chim. Acta* **1979**, *36*, 31-36.
- (7) Nagy, P. I.; Takács-Novák, K. Tautomeric and conformational equilibria of biologically important (hydroxyphenyl)alkylamines in the gas phase and in aqueous solution *PCCP* **2004**, *6*, 2838-2848.

- (8) Sedeh, I. F.; Sjöberg, S.; Öhman, L. O. Equilibrium and structural studies of silicon(IV) and aluminum(III) in aqueous solution. 31. Aqueous complexation between silicic acid and the catecholamines dopamine and L-DOPA *J. Inorg. Biochem.* **1993**, *50*, 119-132.
- (9) Rajan, K. S.; Davis, J. M.; Colburn, R. W. Metal chelates in the storage and transport of neurotransmitters: interactions of metal ions with biogenic amines *J. Neurochem.* **1971**, *18*, 345-364.
- (10) Gh Bagheri, A. Thermodynamic Complexation of Dopamine with Molybdenum (VI) in Media with Different Dielectric Constants *J. Chem. Eng. Data* **2009**, *54*, 2981-2985.
- (11) Gerard, C.; Chehhal, H.; Hugel, R. P. Complexes of iron(III) with ligands of biological interest: dopamine and 8-hydroxyquinoline-5-sulphonic acid *Polyhedron* **1994**, *13*, 541-597.
- (12) Bretti, C.; Crea, F.; De Stefano, C.; Foti, C.; Materazzi, S.; Vianelli, G. Thermodynamic properties of dopamine in aqueous solution. Acid-base properties, distribution, and activity coefficients in NaCl aqueous solutions at different ionic strengths and temperatures *J. Chem. Eng. Data* **2013**, *58*, 2835-2847.
- (13) Grgas-Kučnar, B.; Simeon, V.; Weber, O. A. Complexes of adrenaline and related compounds with  $\text{Ni}^{2+}$ ,  $\text{Cu}^{2+}$ ,  $\text{Zn}^{2+}$ ,  $\text{Cd}^{2+}$  and  $\text{Pb}^{2+}$  *J. Inorg. Nucl. Chem.* **1974**, *36*, 2151-2154.
- (14) Charkoudian, L. K.; Franz, K. J. Fe(III)-Coordination Properties of Neuromelanin Components: 5,6-Dihydroxyindole and 5,6-Dihydroxyindole-2-carboxylic Acid *Inorg. Chem.* **2006**, *45*, 3657-3664.
- (15) Martin, B. R. Zwitterion formation upon deprotonation in l-3,4-dihydroxyphenylalanine and other phenolic amines *J. Phys. Chem.* **1971**, *75*, 2657-2661.
- (16) Jameson, R. F.; Hunter, G.; Kiss, T. A  $^1\text{H}$  nuclear magnetic resonance study of the deprotonation of L-dopa and adrenaline *J. Chem. Soc., Perkin Trans. 2* **1980**, 1105-1110.
- (17) Gergely, A.; Kiss, T.; Deák, G.; Sóvágó, I. Complexes of 3,4-dihydroxyphenyl derivatives IV. Equilibrium studies on some transition metal complexes formed with adrenaline and noradrenaline *Inorg. Chim. Acta* **1981**, *56*, 35-40.
- (18) Balla, J.; Kiss, T.; Jameson, R. F. Copper (II)-catalyzed oxidation of catechol by molecular oxygen in aqueous solution *Inorg. Chem.* **1992**, *31*, 58-62.
- (19) Jameson, R. F.; Neillie, W. F. S. 439. Complexes formed by adrenaline and related compounds with transition-metal ions. Part I. Acid dissociation constants of the ligands *J. Chem. Soc.* **1965**, 2391-2395.
